# Supplementary material
Source: PubMed Central journal article supplement (PMC8289535)
Supplement: 10-1055-s-0040-1701221-s190184.pdf [file 10-1055-s-0040-1701221-s190184.pdf]

**Supplementary Table S1** Table of studies included in the systematic review

| Author                              | Journal                                                                    | Publication year | Number of cases |
|-------------------------------------|----------------------------------------------------------------------------|------------------|-----------------|
| Ahrari et al <sup>13</sup>          | Journal of Neurological Surgery Reports                                    | 2015             | 1               |
| Alzahrani et al <sup>15</sup>       | Case Reports in Otolaryngology Print                                       | 2011             | 1               |
| Amaral et al <sup>16</sup>          | Medicina Oral Patologia Oral y Cirugia Bucal                               | 2008             | 1               |
| Avitia and Osborne <sup>17</sup>    | Ear Nose & Throat Journal                                                  | 2007             | 1               |
| Barosa et al <sup>18</sup>          | European Annals of Otorhinolaryngology, Head and Neck Diseases             | 2014             | 5               |
| Bone et al <sup>19</sup>            | Annals of Otology, Rhinology, and Laryngology                              | 1973             | 1               |
| Bradley et al <sup>20</sup>         | Journal Laryngology and Otology                                            | 1988             | 1               |
| Bundgaard et al <sup>21</sup>       | Archive of Otorhinolaryngology                                             | 1988             | 1               |
| Chaudhari et al <sup>22</sup>       | Bombay Hospital Journal                                                    | 2015             | 1               |
| Chennupati et al <sup>23</sup>      | International Journal of Pediatric Otorhinolaryngology                     | 2008             | 1               |
| Donaldson et al <sup>24</sup>       | International Journal of Pediatric Dental                                  | 2004             | 1               |
| Echchikhi et al <sup>11</sup>       | Journal of Medical Case Reports                                            | 2016             | 1               |
| Epley et al <sup>25</sup>           | Ophthalmic Plastic & Reconstructive Surgery                                | 1998             | 1               |
| Erdur et al <sup>26</sup>           | Journal of Craniofacial Surgery                                            | 2018             | 1               |
| Gadwal et al <sup>27</sup>          | Cancer                                                                     | 2001             | 3               |
| Galera-Ruiz et al <sup>28</sup>     | Auris Nasus Larynx                                                         | 2001             | 1               |
| Gipolous et al <sup>29</sup>        | Journal de radiologie, d'électrologie et archives d'électricité médicale   | 1975             | 1               |
| Gonzalez et al <sup>30</sup>        | Journal of Radiology Case Reports                                          | 2016             | 1               |
| Gupta et al <sup>31</sup>           | Annals of Otology, Rhinology, and Laryngology                              | 1990             | 1               |
| Ha et al <sup>32</sup>              | Laryngoscope                                                               | 1999             | 3               |
| Harris et al <sup>33</sup>          | Laryngoscope                                                               | 1963             | 2               |
| Ito et al <sup>34</sup>             | Neuro-Oncology                                                             | 2010             | 2               |
| Kachhara et al <sup>35</sup>        | Neurologia Medico-Chirurgica (Tokyo)                                       | 1999             | 1               |
| Khosla et al <sup>36</sup>          | Indian Pediatrics                                                          | 1993             | 1               |
| Kohanawa et al <sup>37</sup>        | Auris Nasus Larynx                                                         | 2005             | 1               |
| Lee et al <sup>38</sup>             | British Journal of Ophthalmology                                           | 2014             | 1               |
| Lee et al <sup>39</sup>             | Singapore medical journal                                                  | 2001             | 1               |
| Malalis et al <sup>40</sup>         | Neuro-Ophthalmology                                                        | 2013             | 1               |
| Mark et al <sup>41</sup>            | Archives of Otolaryngology–Head & Neck Surgery                             | 1991             | 3               |
| Mathkour et al <sup>42</sup>        | World Neurosurgery                                                         | 2016             | 1               |
| Oakley et al <sup>43</sup>          | Ear, Nose & Throat Journal                                                 | 2011             | 1               |
| Oda et al <sup>7</sup>              | Head & Neck: Journal for the Sciences and Specialties of the Head and Neck | 1997             | 3               |
| Okinaka and Takahashi <sup>44</sup> | Journal of Oral and Maxillofacial Surgery                                  | 1997             | 1               |
| Papsidero et al <sup>45</sup>       | Otolaryngology Head and Neck Surgery                                       | 1982             | 1               |
| Patel et al <sup>63</sup>           | Cancer                                                                     | 2011             | 4               |
| Park et al <sup>46</sup>            | Skeletal Radiology                                                         | 2004             | 1               |
| Park et al <sup>47</sup>            | Journal of Oral and Maxillofacial Surgery                                  | 2014             | 1               |
| Park et al <sup>48</sup>            | Skeletal Radiology                                                         | 2003             | 1               |
| Santos-Silva et al <sup>49</sup>    | American Journal of Orthodontics and Dentofacial Orthopedics               | 2011             | 1               |
| Sargi et al <sup>50</sup>           | Otolaryngology Head and Neck Surgery                                       | 2008             | 1               |
| Shahid et al <sup>51</sup>          | Medcal Journal of Malaysia                                                 | 2007             | 1               |
| Sheikh et al <sup>52</sup>          | Journal of Clinical and Experimental Dentistry                             | 2010             | 1               |
| Smith et al <sup>53</sup>           | International Journal of Radiation Oncology Biology Physics                | 1989             | 4               |
| Smoron et al <sup>54</sup>          | Sarcoma                                                                    | 1999             | 1               |

(Continued)

**Supplementary Table S1** (Continued)

| Author                        | Journal                                        | Publication year | Number of cases |
|-------------------------------|------------------------------------------------|------------------|-----------------|
| Stavrakas et al <sup>55</sup> | Journal of Laryngology and Otology             | 2016             | 2               |
| Tseng et al <sup>56</sup>     | Archives of Otolaryngology–Head & Neck Surgery | 2005             | 1               |
| Uysal et al <sup>57</sup>     | Pediatric Hematology Oncology                  | 2001             | 1               |
| Vlychou et al <sup>58</sup>   | Skeletal Radiology                             | 2007             | 1               |
| Wei-wei et al <sup>59</sup>   | Laryngoscope                                   | 2005             | 2               |
| Wolfowitz <sup>60</sup>       | Journal of Laryngology Otology                 | 1973             | 1               |
| Yamada et al <sup>61</sup>    | Journal of Medical Case Reports                | 2013             | 1               |
| Yamaguchi et al <sup>62</sup> | Clinical Oral Investigation                    | 2004             | 1               |
| Yip et al <sup>14</sup>       | Ophthalmology                                  | 2003             | 1               |

**Supplementary Table S2** The institute of health economics quality appraisal checklist for case series

|                                                                                                                    | Barosa <sup>18</sup> | Gadwal <sup>27</sup> | Ha <sup>32</sup> | Mark <sup>41</sup> | Harris <sup>33</sup> | Ito <sup>34</sup> | Oda <sup>7</sup> | Patel <sup>63</sup> | Smith <sup>74</sup> | Stavrakas <sup>55</sup> | Wei-wei <sup>59</sup> |
|--------------------------------------------------------------------------------------------------------------------|----------------------|----------------------|------------------|--------------------|----------------------|-------------------|------------------|---------------------|---------------------|-------------------------|-----------------------|
| <b>Study objective</b>                                                                                             |                      |                      |                  |                    |                      |                   |                  |                     |                     |                         |                       |
| 1. Was the hypothesis/aim/objective of the study clearly stated?                                                   | Y                    | Y                    | Y                | Y                  | Y                    | Y                 | Y                | Y                   | Y                   | Y                       | Y                     |
| <b>Study design</b>                                                                                                |                      |                      |                  |                    |                      |                   |                  |                     |                     |                         |                       |
| 2. Was the study conducted prospectively?                                                                          | N                    | N                    | N                | N                  | N                    | N                 | N                | N                   | N                   | N                       | N                     |
| 3. Were the cases collected in more than one center?                                                               | N                    | Y                    | N                | N                  | Y                    | N                 | N                | N                   | N                   | N                       | N                     |
| 4. Were patients recruited consecutively?                                                                          | U                    | U                    | U                | Y                  | Y                    | U                 | Y                | Y                   | Y                   | Y                       | Y                     |
| <b>Study population</b>                                                                                            |                      |                      |                  |                    |                      |                   |                  |                     |                     |                         |                       |
| 5. Were the characteristics of the patients included in the study described?                                       | Y                    | Y                    | Y                | Y                  | Y                    | Y                 | Y                | Y                   | Y                   | Y                       | Y                     |
| 6. Were the eligibility criteria (i.e., inclusion and exclusion criteria) for entry into the study clearly stated? | Y                    | Y                    | P                | P                  | P                    | P                 | Y                | Y                   | Y                   | P                       | Y                     |
| 7. Did patients enter the study at a similar point in the disease?                                                 | Y                    | Y                    | Y                | Y                  | Y                    | Y                 | Y                | Y                   | Y                   | Y                       | Y                     |
| <b>Intervention and cointervention</b>                                                                             |                      |                      |                  |                    |                      |                   |                  |                     |                     |                         |                       |
| 8. Was the intervention of interest clearly described?                                                             | Y                    | Y                    | P                | P                  | Y                    | P                 | P                | Y                   | Y                   | P                       | Y                     |
| 9. Were additional interventions (cointerventions) clearly described?                                              | Y                    | Y                    | P                | P                  | P                    | N                 | P                | Y                   | P                   | P                       | P                     |
| <b>Outcome measures</b>                                                                                            |                      |                      |                  |                    |                      |                   |                  |                     |                     |                         |                       |
| 10. Were relevant outcome measures established a priori?                                                           | Y                    | Y                    | Y                | Y                  | Y                    | Y                 | Y                | Y                   | Y                   | Y                       | Y                     |
| 11. Were outcome assessors blinded to the intervention that patients received?                                     | Y                    | Y                    | Y                | Y                  | Y                    | Y                 | Y                | Y                   | Y                   | Y                       | Y                     |
| 12. Were the relevant outcomes measured using appropriate objective/subjective methods?                            | Y                    | Y                    | Y                | Y                  | Y                    | Y                 | Y                | Y                   | Y                   | Y                       | Y                     |
| 13. Were the relevant outcome measures made before and after the intervention?                                     | Y                    | Y                    | Y                | Y                  | Y                    | P                 | Y                | Y                   | Y                   | Y                       | Y                     |
| <b>Statistical analysis</b>                                                                                        |                      |                      |                  |                    |                      |                   |                  |                     |                     |                         |                       |
| 14. Were the statistical tests used to assess the relevant outcomes appropriate?                                   | Y                    | Y                    | Y                | Y                  | Y                    | Y                 | Y                | Y                   | Y                   | Y                       | Y                     |
| <b>Results and conclusions</b>                                                                                     |                      |                      |                  |                    |                      |                   |                  |                     |                     |                         |                       |
| 15. Was follow-up long enough for important events and outcomes to occur?                                          | U                    | Y                    | U                | U                  | N                    | Y                 | N                | Y                   | Y                   | N                       | Y                     |
| 16. Were losses to follow-up reported?                                                                             | N                    | Y                    | Y                | Y                  | N                    | N                 | Y                | N                   | Y                   | Y                       | Y                     |
| 17. Did the study provided estimates of random variability in the data analysis of relevant outcomes?              | Y                    | Y                    | Y                | Y                  | Y                    | Y                 | Y                | Y                   | Y                   | Y                       | Y                     |
| 18. Were the adverse events reported?                                                                              | N                    | N                    | N                | N                  | Y                    | Y                 | N                | N                   | N                   | N                       | Y                     |
| 19. Were the conclusions of the study supported by the results?                                                    | Y                    | Y                    | Y                | Y                  | Y                    | Y                 | Y                | Y                   | Y                   | Y                       | Y                     |
| 20. Were both competing interests and sources of support for the study reported?                                   | Y                    | P                    | N                | N                  | N                    | N                 | N                | Y                   | N                   | P                       | N                     |

Abbreviations: N, no; P/U, partial/unclear; Y, yes.

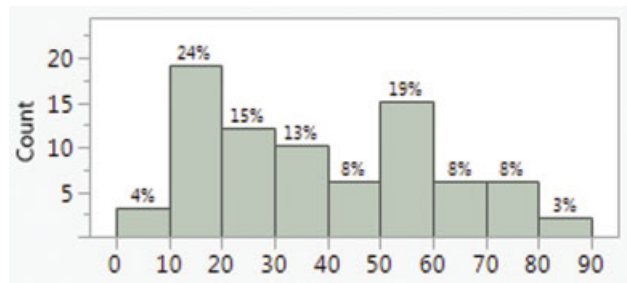

**Supplementary Fig. S1** Histogram of age showing bimodal age distribution.
